# Supplementary material
Source: publisher figshare collection journal article supplement (https://acs.figshare.com/ndownloader/files/3730192)
Supplement: Supplementary file 1 [file 3730192]

# *Supporting Information*

## Similarities between *N*-acetylcysteine and Glutathione in Binding to Lead(II) Ions

*Natalie S. Sisombath and, Farideh Jalilehvand \**

Department of Chemistry, University of Calgary, 2500 University Drive NW, Calgary, Alberta  
T2N 1N4, Canada

### Table of Contents

**Figure S1.** Structures of sulfur-bound Pb(II) complexes for which  $^{207}\text{Pb}$  NMR chemical shifts and references have been summarized in Table 3.

**Figure S2.** X-ray absorption near-edge features in the XANES spectra of Pb(II) *N*-acetylcysteine solutions, containing  $C_{\text{Pb(II)}} = 10 \text{ mM}$ , 100 mM and  $\text{H}_2\text{NAC}/\text{Pb(II)}$  mole ratios 2.1 (pH = 9.4) and 10.0 (pH = 9.1).

**Figure S3.** Pb L<sub>III</sub>-edge  $k^3$ -weighted EXAFS spectrum of a lead(II) glutathione solution ( $C_{\text{Pb(II)}} = 10 \text{ mM}$ ;  $C_{\text{GSH}} = 20 \text{ mM}$ ; pH = 8.5) compared with those of Pb(II) *N*-acetyl cysteine solutions A and A\* (pH = 9.4,  $\text{H}_2\text{NAC}/\text{Pb(II)}$  mole ratio 2.1), and their corresponding Fourier-transforms.

**Figure S4.** Comparison between Pb L<sub>III</sub>-edge  $k^3$ -weighted EXAFS spectra and corresponding Fourier-transforms for Pb(II) *N*-acetyl cysteine solutions, containing  $C_{\text{Pb(II)}} = 10 \text{ mM}$ , 100 mM\*, and  $\text{H}_2\text{NAC}/\text{Pb(II)}$  mole ratios 2.1 (A, A\*, pH = 9.4), 3.0 (B, B\*, pH = 9.1) and 10.0 (E, E\*, pH = 9.1).

**Table S1.** Assignment of mass ions observed in ESI-MS spectra (positive-ion mode) for Pb(II) *N*-acetylcysteine solutions A, B and E ( $C_{\text{Pb(II)}} = 10 \text{ mM}$ ; mole ratio  $\text{H}_2\text{NAC}/\text{Pb(II)} = 2.1, 3.0$  and 10.0, respectively)

**Table S2.** Comparison of differences in  $^{13}\text{C}$  NMR chemical shifts ( $\Delta\delta$ ) for lead(II) *N*-acetylcysteine solutions A – E ( $C_{\text{Pb(II)}} = 10 \text{ mM}$ ) relative to those of pure *N*-acetylcysteine solution (0.1 M; pH = 9.1)

**Table S3.** Structural parameters obtained from EXAFS least-squares curve-fitting for a Pb(II) GSH solution containing  $C_{\text{Pb(II)}} = 10 \text{ mM}$ ,  $C_{\text{GSH}} = 20 \text{ mM}$  (pH = 8.5) measured at RT, using different EXAFS fitting models.

**Table S1.** Assignment of mass ions observed in ESI-MS spectra (positive-ion mode) for Pb(II) *N*-acetylcysteine solutions A, B and E ( $C_{\text{Pb(II)}} = 10 \text{ mM}$ ; mole ratio  $\text{H}_2\text{NAC}/\text{Pb(II)} = 2.1, 3.0$  and  $10.0$ , respectively) <sup>a</sup>

| $m/z$ (amu) | assignment                                                 | $m/z$ (amu) | assignment                                                           |
|-------------|------------------------------------------------------------|-------------|----------------------------------------------------------------------|
| 164.04      | $[\text{H}_2\text{NAC} + \text{H}^+]^+$                    | 555.01      | $[\text{Na}^+ + \text{Pb}(\text{H}_2\text{NAC})_2 - 2\text{H}^+]^+$  |
| 186.01      | $[\text{Na}^+ + \text{H}_2\text{NAC}]^+$                   | 556.04      | $[3\text{Na}^+ + 3(\text{H}_2\text{NAC}) - 2\text{H}^+]^+$           |
| 294.00      | $[\text{Pb}(\text{C}_3\text{H}_4\text{NO}_2)]^+$           | 578.02      | $[4\text{Na}^+ + 3(\text{H}_2\text{NAC}) - 3\text{H}^+]^+$           |
| 349.05      | $[\text{Na}^+ + 2(\text{H}_2\text{NAC})]^+$                | 738.98      | $[\text{Pb}_2(\text{H}_2\text{NAC})_2 - 3\text{H}^+]^+$              |
| 370.00      | $[\text{Pb}(\text{H}_2\text{NAC}) - \text{H}^+]^+$         | 740.02      | $[2\text{Na}^+ + \text{Pb}(\text{H}_2\text{NAC})_3 - 3\text{H}^+]^+$ |
| 371.03      | $[2\text{Na}^+ + 2(\text{H}_2\text{NAC}) - \text{H}^+]^+$  | 741.05      | $[4\text{Na}^+ + 4(\text{H}_2\text{NAC}) - 3\text{H}^+]^+$           |
| 393.01      | $[3\text{Na}^+ + 2(\text{H}_2\text{NAC}) - 2\text{H}^+]^+$ | 763.04      | $[5\text{Na}^+ + 4(\text{H}_2\text{NAC}) - 4\text{H}^+]^+$           |

<sup>a</sup>  $\text{H}_2\text{NAC}$  ( $\text{C}_5\text{H}_9\text{NO}_3\text{S}$ );  $m = 163.03$

**Table S2.** Comparison of differences in  $^{13}\text{C}$  NMR chemical shifts ( $\Delta\delta$ ) for lead(II) *N*-acetylcysteine solutions A – E ( $C_{\text{Pb(II)}} = 10 \text{ mM}$ ) relative to those of a pure *N*-acetylcysteine solution ( $0.1 \text{ M}$ ;  $\text{pH} = 9.1$ ); see Figure 3

| Solution | $\Delta\delta$ ( $^{13}\text{C}$ , ppm) |              |
|----------|-----------------------------------------|--------------|
|          | $\text{C}_1$                            | $\text{C}_3$ |
| A        | 0.5                                     | 3.1          |
| B        | 0.6                                     | 2.4          |
| C        | 0.5                                     | 2.0          |
| D        | 0.4                                     | 1.6          |
| E        | 0.2                                     | 0.8          |

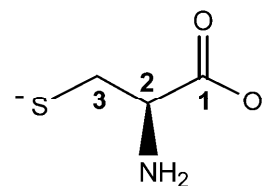

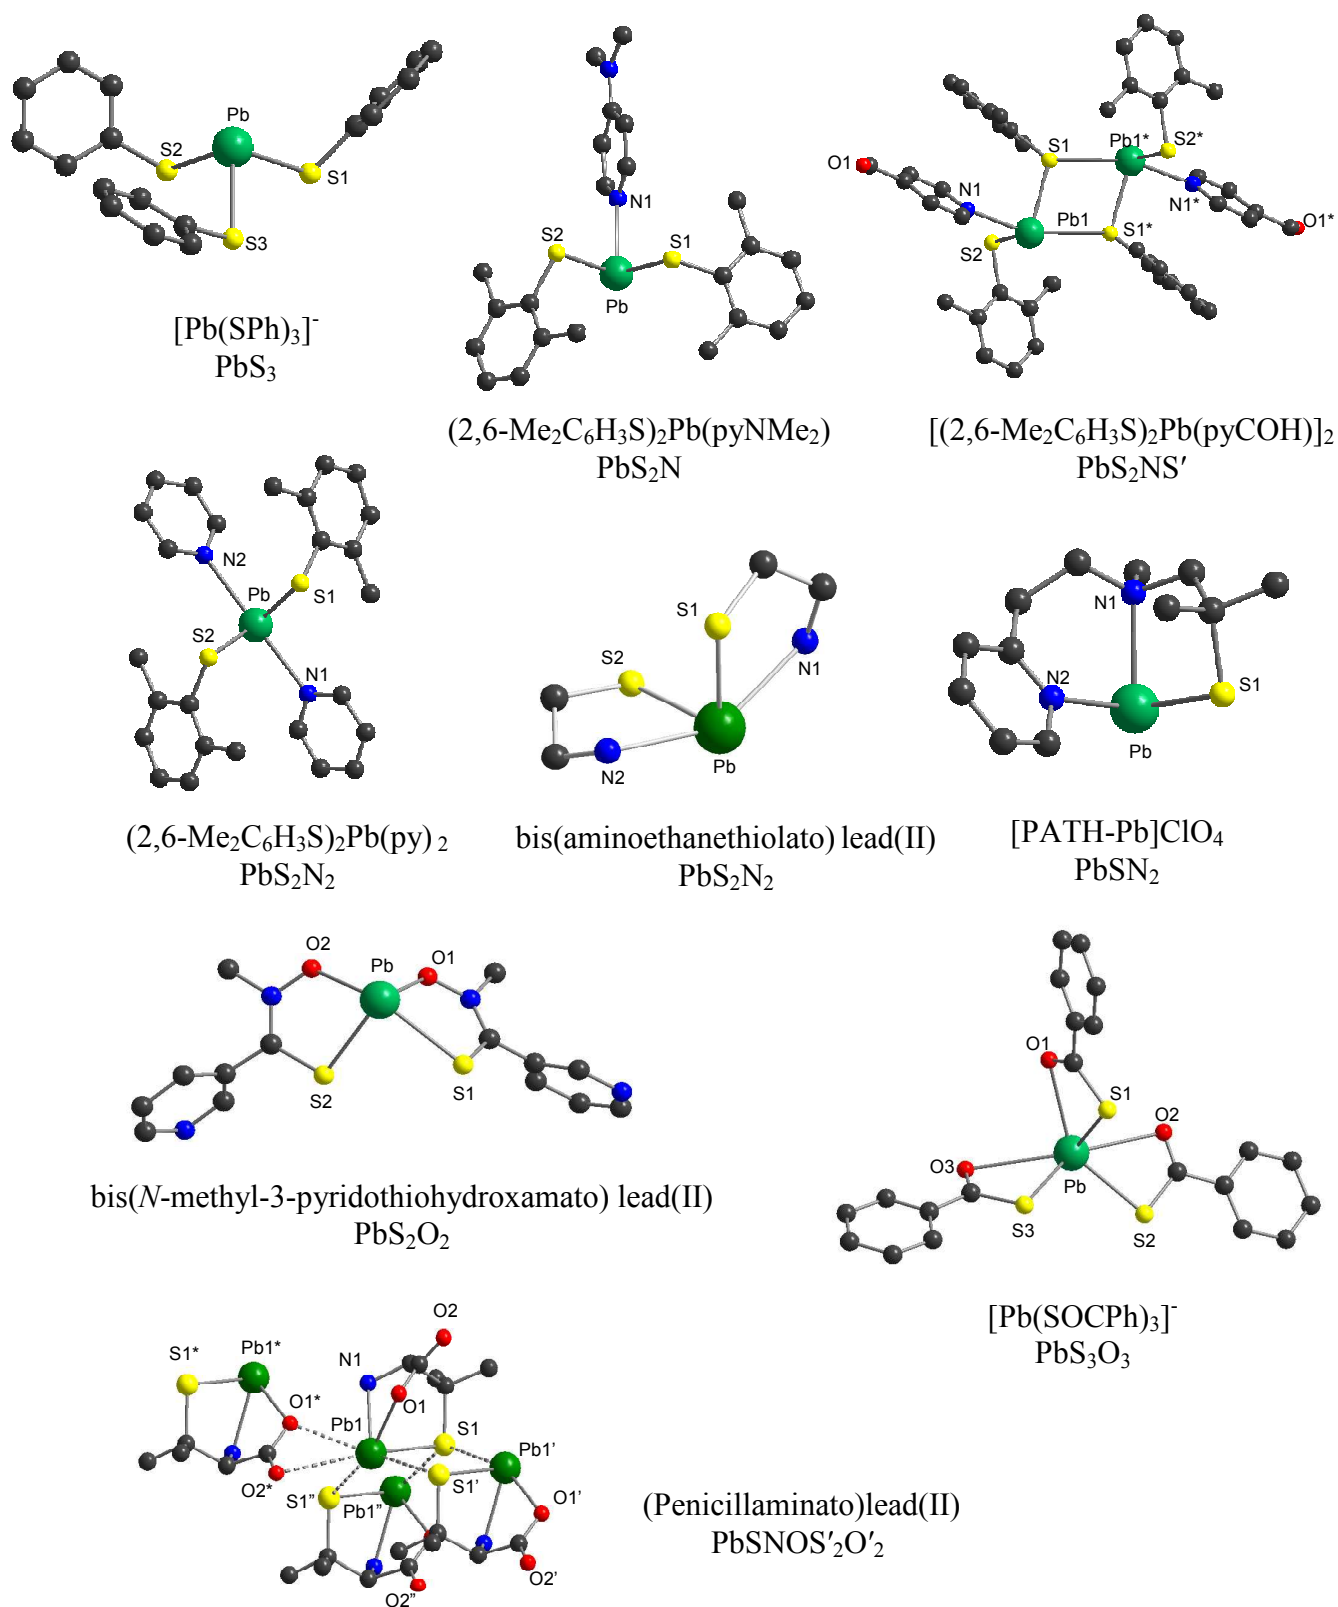

**Figure S1.** Structures of sulfur-bound Pb(II) complexes for which <sup>207</sup>Pb NMR chemical shifts and references have been summarized in Table 2; H-atoms were removed for clarity.

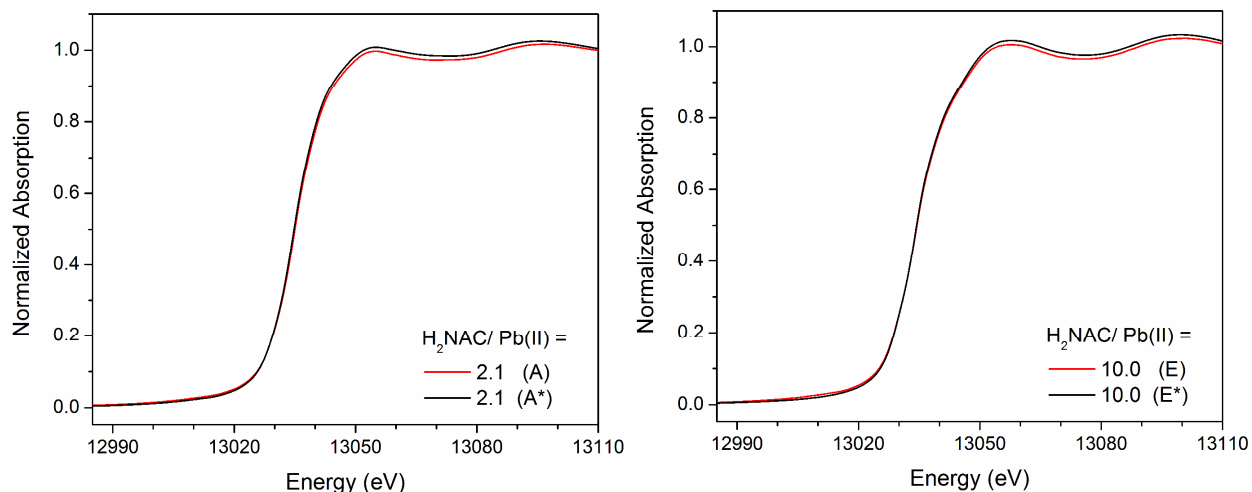

**Figure S2.** X-ray absorption near-edge features in the XANES spectra of Pb(II) *N*-acetylcysteine solutions, containing  $C_{\text{Pb(II)}} = 10$  mM (red), 100 mM (black) and  $\text{H}_2\text{NAC}/\text{Pb(II)}$  mole ratios 2.1 (pH = 9.4) and 10.0 (pH = 9.1), showing similar features for each set.

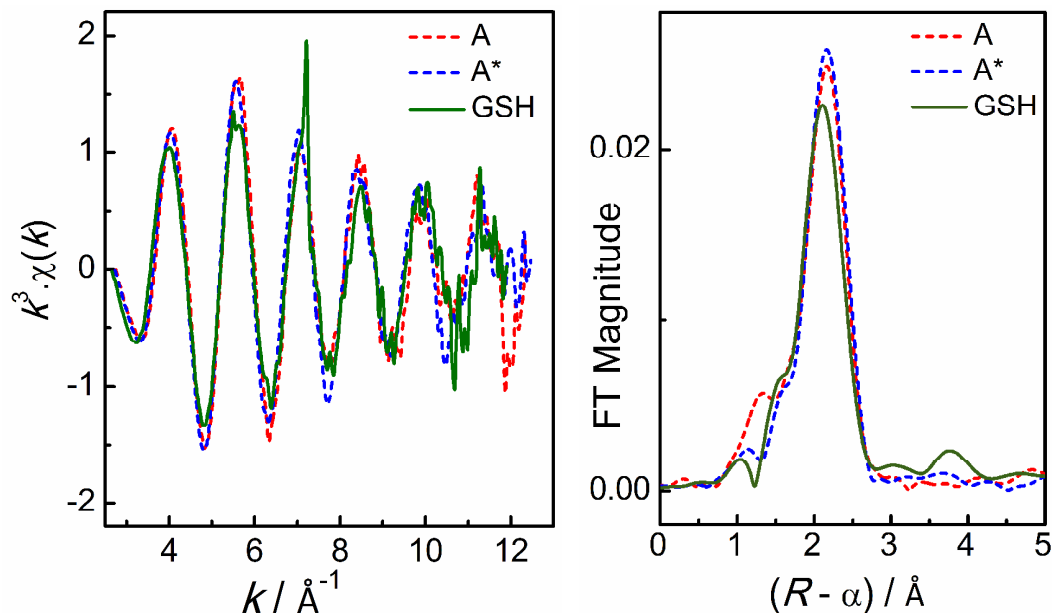

**Figure S3.** Pb  $L_{\text{III}}$ -edge  $k^3$ -weighted EXAFS spectrum of a lead(II) glutathione solution ( $C_{\text{Pb(II)}} = 10$  mM;  $C_{\text{GSH}} = 20$  mM; pH = 8.5) measured in fluorescence mode (solution A in *Ref.* 26) compared with those of Pb(II) *N*-acetyl cysteine solutions A and A\* (pH = 9.4), containing  $\text{H}_2\text{NAC}/\text{Pb(II)}$  mole ratio 2.1, and their corresponding Fourier-transforms.

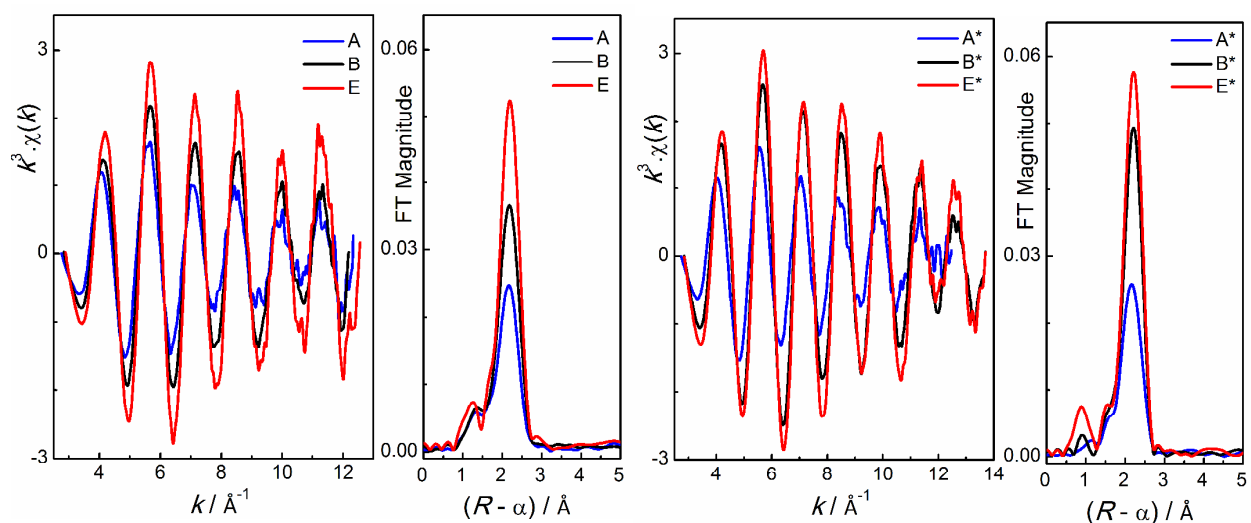

**Figure S4.** Comparison between Pb L<sub>III</sub>-edge  $k^3$ -weighted EXAFS spectra and corresponding Fourier-transforms for Pb(II) *N*-acetyl cysteine solutions, containing  $C_{\text{Pb(II)}} = 10$  mM (*left*), 100 mM (*right*), and H<sub>2</sub>NAC/Pb(II) mole ratios 2.1 (A, A\*, pH = 9.4), 3.0 (B, B\*, pH = 9.1) and 10.0 (E, E\*, pH = 9.1).

**Table S3.** Structural parameters obtained from EXAFS least-squares curve-fitting for a Pb(II) GSH solution containing  $C_{\text{Pb(II)}} = 10$  mM,  $C_{\text{GSH}} = 20$  mM (pH = 8.5; solution A in *Ref.* 26) measured at RT, using different EXAFS fitting models.<sup>a,b</sup>

| Model                   | Pb-S   |         |                              | Pb-N |         |                              | Pb...Pb |         |                              | R                 |
|-------------------------|--------|---------|------------------------------|------|---------|------------------------------|---------|---------|------------------------------|-------------------|
|                         | $N$    | $R$ (Å) | $\sigma^2$ (Å <sup>2</sup> ) | $N$  | $R$ (Å) | $\sigma^2$ (Å <sup>2</sup> ) | $N$     | $R$ (Å) | $\sigma^2$ (Å <sup>2</sup> ) |                   |
| <b>I</b>                | 2.7    | 2.63    | 0.0107                       |      |         |                              |         |         |                              | 28.5              |
| <b>II</b>               | $2f$   | 2.66    | 0.0122                       | $1f$ | 2.48    | 0.0036                       |         |         |                              | 29.8              |
| <b>III</b> <sup>c</sup> | $2f$   | 2.65    | 0.0156                       | $2f$ | 2.51    | 0.0056                       |         |         |                              | 29.4 <sup>c</sup> |
| <b>IV</b>               | $2f$   | 2.62    | 0.0080                       |      |         |                              | $1f$    | 3.84    | 0.015                        | 27.9              |
|                         | $1f$   | 2.76    | 0.0117                       |      |         |                              |         |         |                              |                   |
| <b>V</b>                | 1.9    | 2.62    | 0.0076                       |      |         |                              | $1f$    | 3.84    | 0.015                        | 27.9              |
|                         | $1f$   | 2.75    | 0.0109                       |      |         |                              |         |         |                              |                   |
| <b>VI</b>               | $1.9f$ | 2.62    | 0.0076                       |      |         |                              | $1f$    | 3.84    | 0.015                        | 27.9              |
|                         | 0.9    | 2.75    | 0.0100                       |      |         |                              |         |         |                              |                   |

<sup>a</sup> Refined  $N$  accurate within  $\pm 20$  %;  $S_0^2 = 0.9$ ,  $f$  fixed; R = residual. <sup>b</sup> Estimated error limits for  $R$  is  $\pm 0.04$  Å and for  $\sigma^2 \pm 0.002$  Å<sup>2</sup>; <sup>c</sup> the model shown in Figure 7 and Table 5 of *Ref.* 26
